# Supplementary material for: Preclinical Models for Neuroblastoma: Establishing a Baseline for Treatment
Source: PubMed Central journal article supplement (PMC3084749; doi:10.1371/journal.pone.0019133), 2011-04-29
Supplement: pone.0019133.s003.pdf [file pone.0019133.s003.pdf]

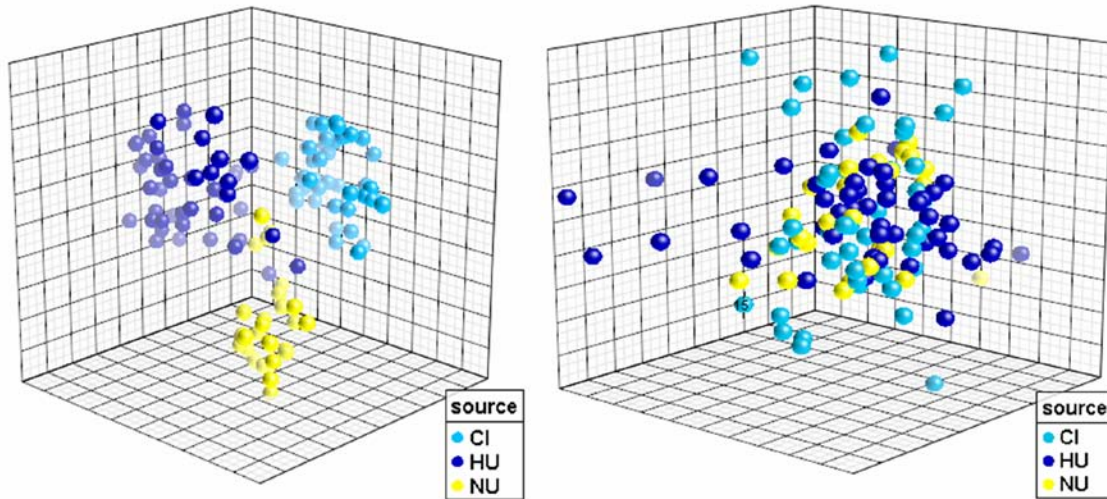

Human NB data were obtained from three GEO neuroblastoma studies (Gene Expression Omnibus-public data bases from the Curie Institute, Hiroshima University and Newcastle University and combined to give a total of 125 gene expression arrays. The data was then examined by principle component analysis (PCA) and collated with meta-data describing each tumor. The 125 arrays were adjusted by batch correction method included in Partek Genomics Suite 6.4. Data from Affymetrix human U133 v2 arrays and mouse Affymetrix 430 v2 arrays were processed using the RMA algorithm. This data was then used to examine data quality by PCA for each species separately. The corrections described above removed much of the data variability (compare right and left panels).

**A. Source and number of human tumor microarray samples.**

| Source               | Number of Tumors | Percent total |
|----------------------|------------------|---------------|
| Curie Institute      | 45               | 36            |
| Hiroshima University | 50               | 40            |
| Newcastle University | 30               | 24            |
| Total                | 125              | 100           |

**References:**

1. Anoueix-Lerosey I, Lequin D, Brugières L, Ribeiro A et al.(2008) Somatic and germline activating mutations of the ALK kinase receptor in neuroblastoma. Nature 16; 455(7215):967-70. PMID: [18923523](#) GSE12460
2. Lastowska M, Viprey V, Santibanez-Koref M, Wappler I et al. (2007) Identification of candidate genes involved in neuroblastoma progression by combining genomic and expression microarrays with survival data. Oncogene; 26(53):7432-44. PMID: [17533364](#) GSE13141.
3. Expression data of human neuroblastoma tissue samples. Unpublished GSE16237  
Contact name Eiso Hiyama E-mail(s) [eiso@hiroshima-u.ac.jp](mailto:eiso@hiroshima-u.ac.jp) Hiroshima University

**B. Human tumor frequency by stage and MYCN status**

| Stage | Myc amp + | Myc amp - | Total |
|-------|-----------|-----------|-------|
| 1     | 4         | 29        | 33    |
| 2     | 2         | 15        | 17    |
| 3     | 4         | 9         | 13    |
| 4     | 4         | 21        | 24    |
| 4S    | 0         | 17        | 17    |

C. Tumor frequency stage and MYCN status by source

| Stage     | Curie Institute    |          | Hiroshima University |          | New Castle University |          |
|-----------|--------------------|----------|----------------------|----------|-----------------------|----------|
|           | MYCN Amplification |          | MYCN Amplification   |          | MYCN Amplification    |          |
|           | +                  | -        | +                    | -        | +                     | -        |
| 1         | 3                  | 5        | 1                    | 20       | 0                     | 4        |
| 2         | 1                  | 8        | 1                    | 5        | 0                     | 2        |
| 3         | 3                  | 4        | 1                    | 4        | 0                     | 1        |
| 4         | 7                  | 6        | 4                    | 8        | 10                    | 10       |
| <b>4S</b> | -                  | <b>8</b> | -                    | <b>6</b> | -                     | <b>3</b> |
